# Supplementary material for: Inhibition of HIV Replication by Apolipoprotein A-I Binding Protein Targeting the Lipid Rafts
Source: PubMed Central journal article supplement (PMC6974568; doi:10.1128/mbio.02956-19), 2020-01-21
Supplement: mBio.02956-19-sf002.pdf [file mBio.02956-19-sf002.pdf]

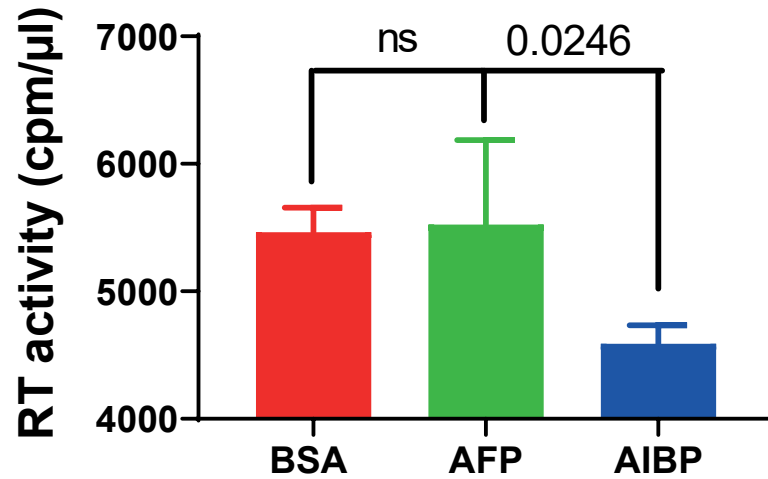

**Figure S2. AIBP inhibits HIV-1 replication.** PHA-activated PBMCs were infected in quadruplicate wells with HIV-1 LAI and cultured for 5 days in the presence of 0.2 μg/ml of BSA, baculovirus-expressed alpha-fetoprotein (AFP), or baculovirus-expressed AIBP. Virus production was measured by RT activity in culture supernatant. Results are presented as mean±SD, p values were calculated by ordinary one-way ANOVA with Tukey correction for multiple comparisons.
