# Supplementary material for: Inhibition of HIV Replication by Apolipoprotein A-I Binding Protein Targeting the Lipid Rafts
Source: PubMed Central journal article supplement (PMC6974568; doi:10.1128/mbio.02956-19), 2020-01-21
Supplement: mBio.02956-19-sf003.pdf [file mBio.02956-19-sf003.pdf]

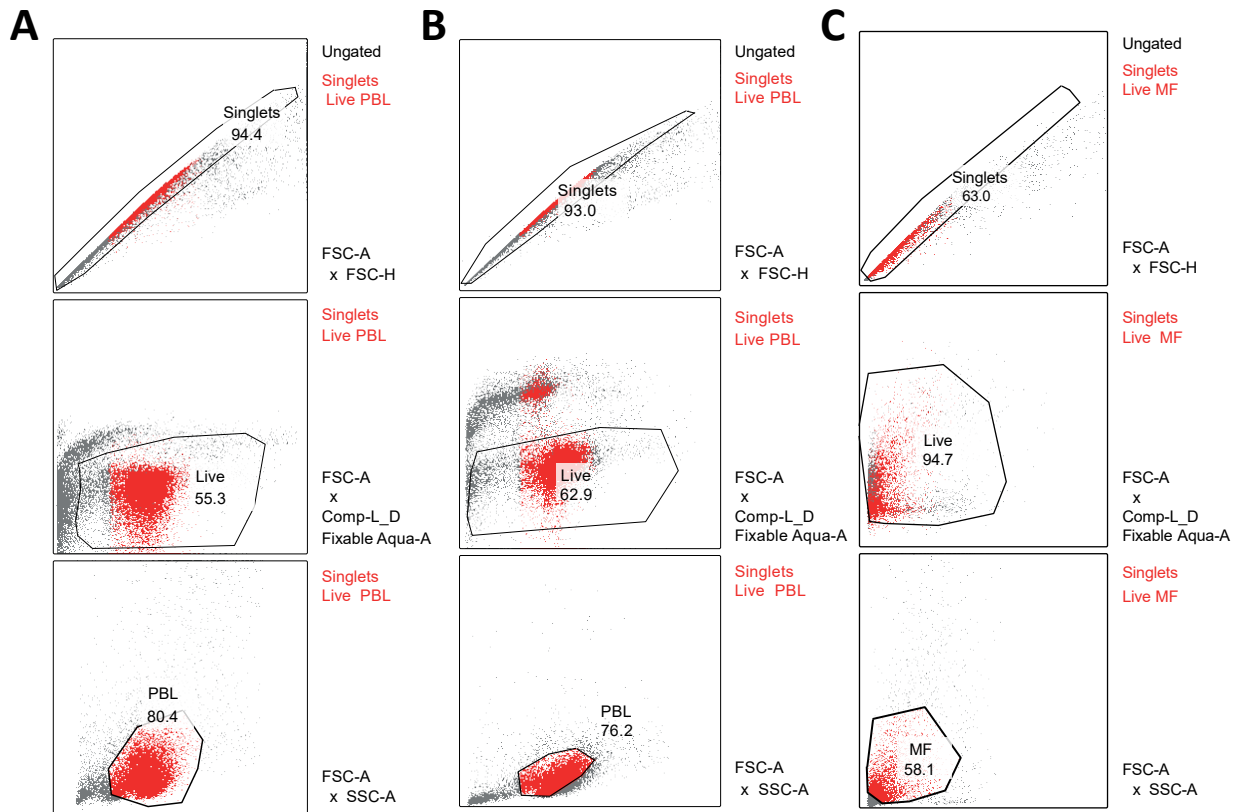

**Figure S3. Gating strategy for Fig. 2.** A – gating for unactivated PBL (Fig. 2A); B – gating for activated PBL (Fig. 2A); C – gating for MDM (Fig. 2C).
