# Supplementary material for: Inhibition of HIV Replication by Apolipoprotein A-I Binding Protein Targeting the Lipid Rafts
Source: PubMed Central journal article supplement (PMC6974568; doi:10.1128/mbio.02956-19), 2020-01-21
Supplement: mBio.02956-19-sf004.pdf [file mBio.02956-19-sf004.pdf]

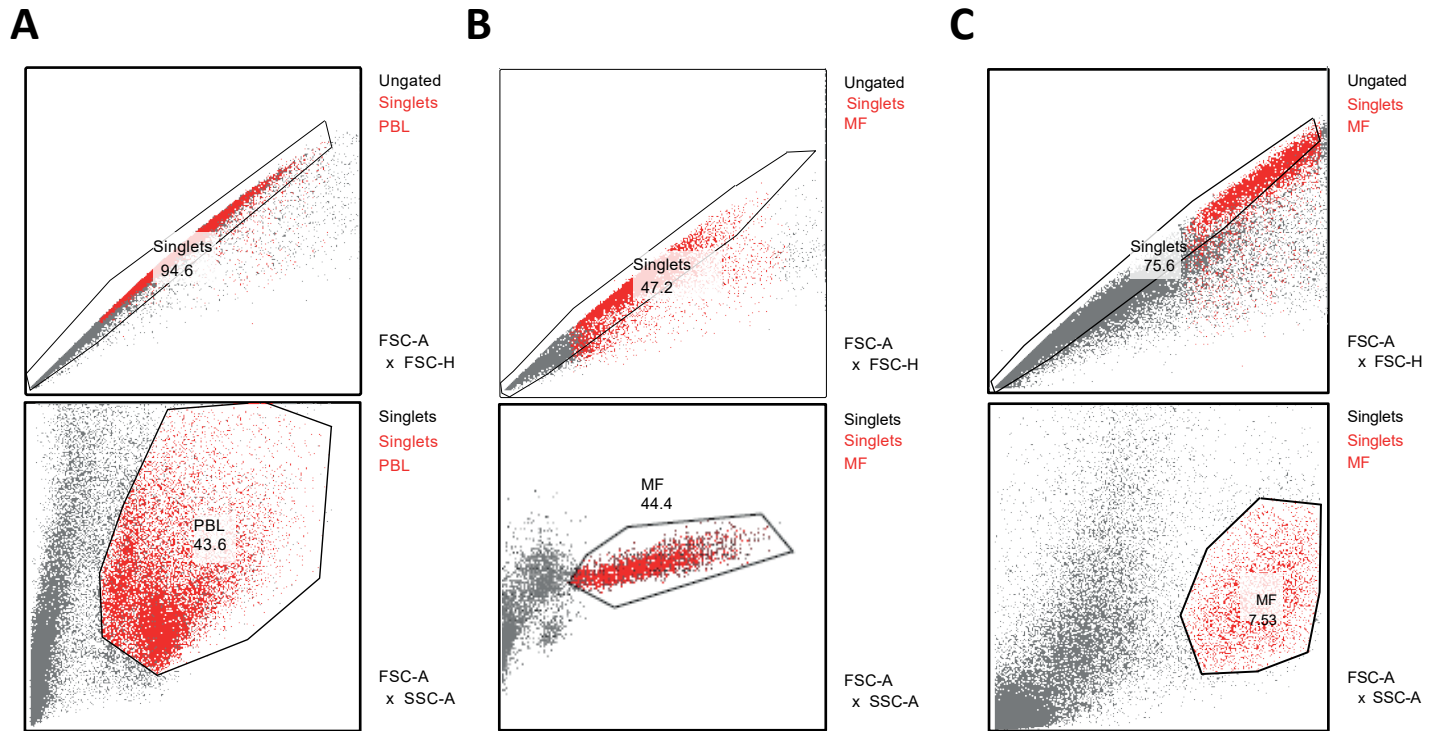

**Figure S4. Gating strategy for Fig. 3.** A – gating for PBL (Fig. 3A); B – gating for MDM (Fig. 3C); C – gating for MDM (Fig. 3F).
